# Supplementary material for: Time-Course Analysis of Gene Expression During the Saccharomyces cerevisiae Hypoxic Response
Source: PubMed Central journal article supplement (PMC5217111; doi:10.1534/g3.116.034991), 2016-11-09
Supplement: 221FigureS1.pdf [file 221FigureS1.pdf]

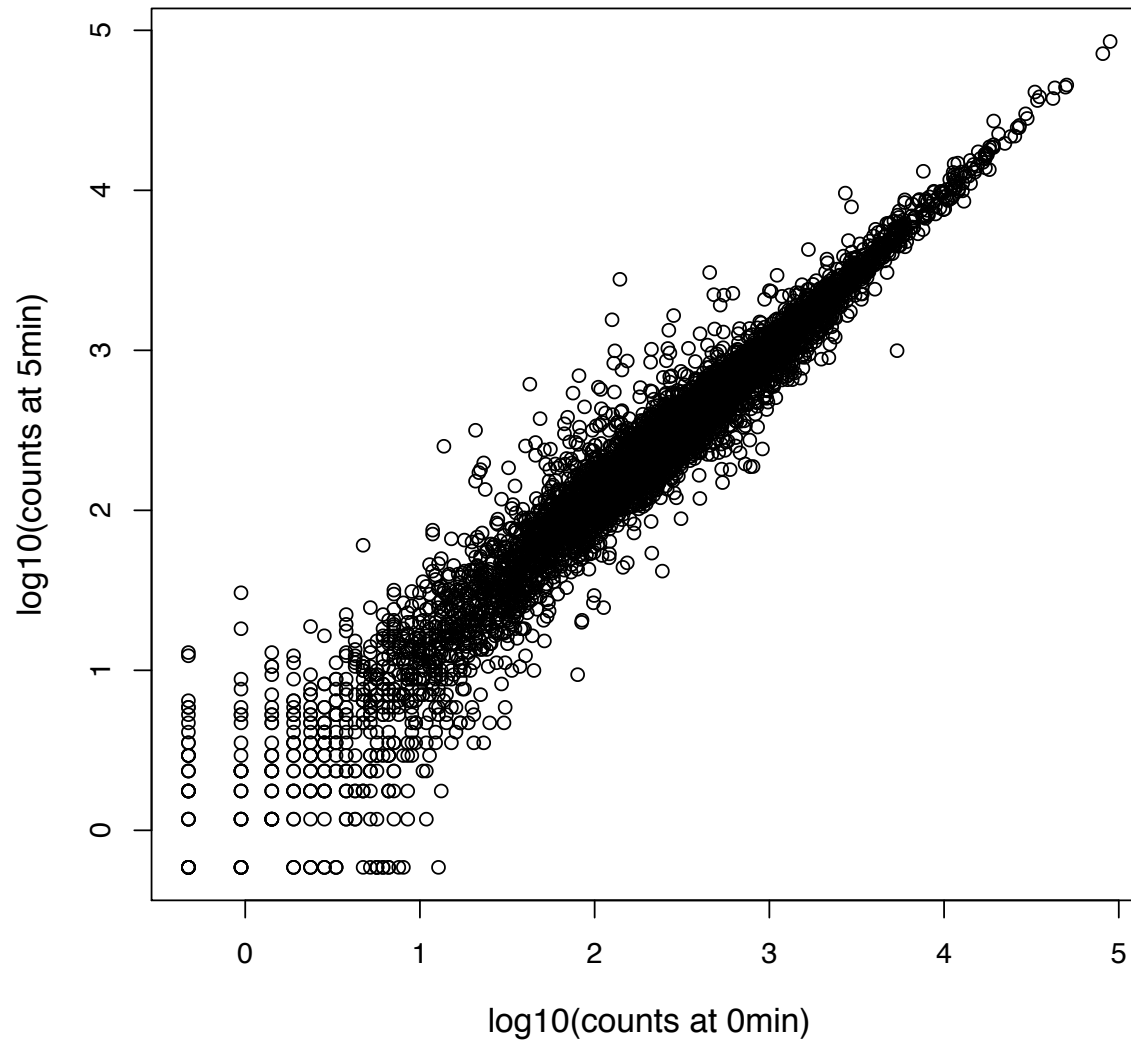

**Figure S1.** Reproducibility of RNA-seq, comparing number of counts between the 0- and 5- minute samples. Pearson correlation = 0.991. The lowest Pearson correlation when comparing all 8 time points is 0.866 (0- vs. 240-minute).
