# Supplementary material for: Time-Course Analysis of Gene Expression During the Saccharomyces cerevisiae Hypoxic Response
Source: PubMed Central journal article supplement (PMC5217111; doi:10.1534/g3.116.034991), 2016-11-09
Supplement: 221FigureS2.pdf [file 221FigureS2.pdf]

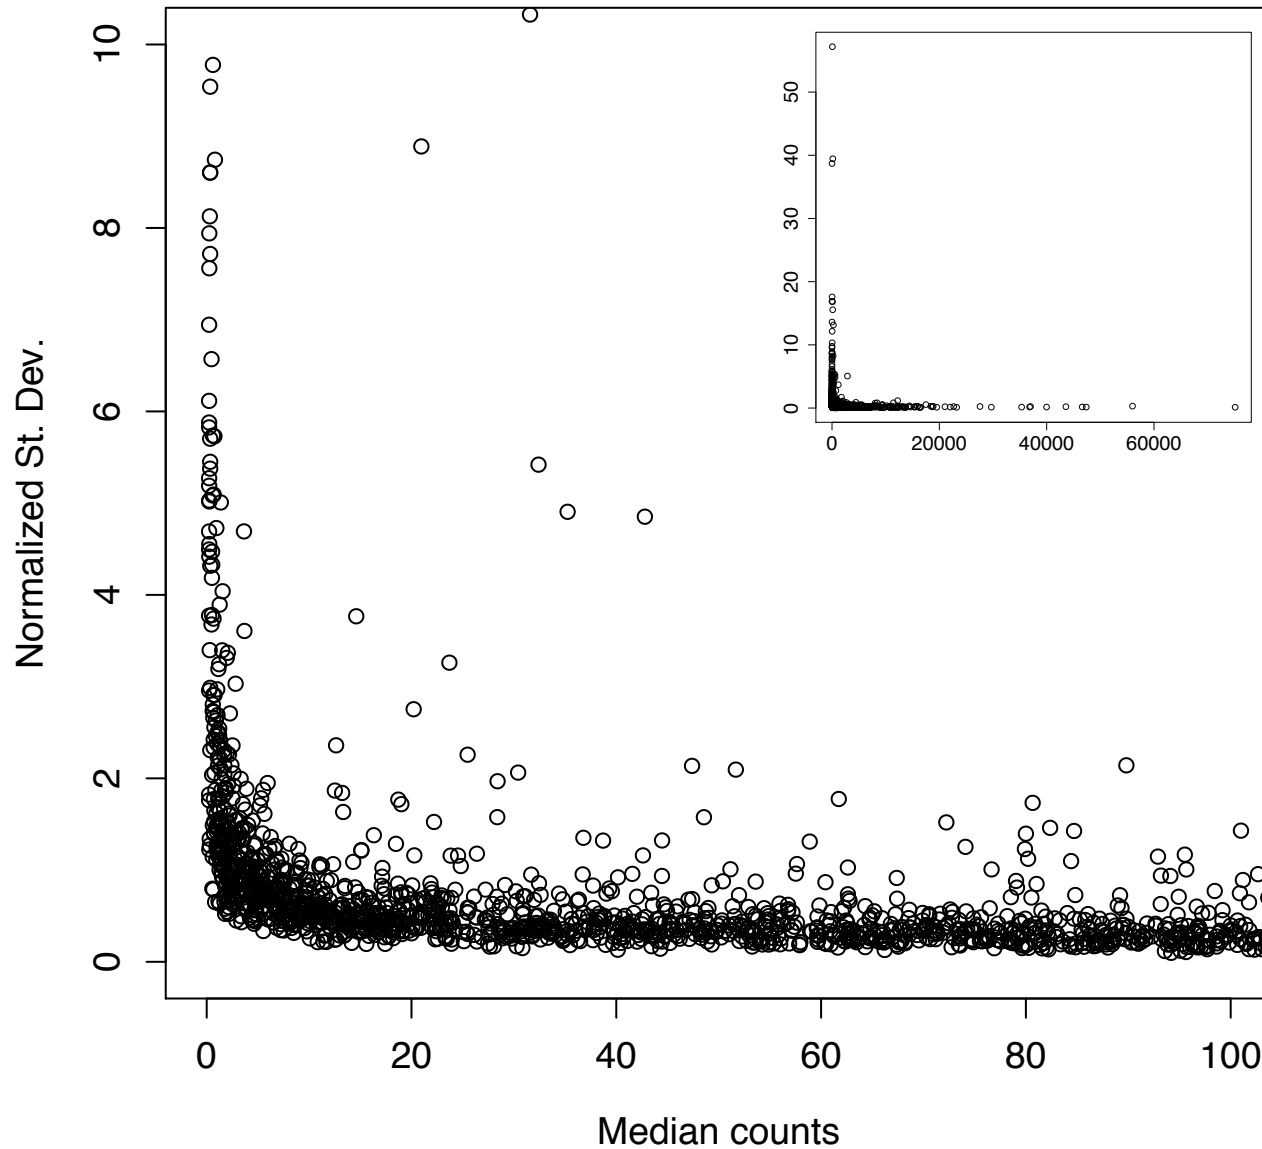

**Figure S2.** Determining the “floor” of read counts, or the minimum reliable read count. The median count and normalized standard deviation ( $sd/mean$ ) for each gene was calculated across the eight time points. As the read count decreases below 20, the standard deviation increases dramatically, suggesting high technical variation. The larger graph presents 0-100 read counts, whereas the inset presents all data.
