# Supplementary material for: Time-Course Analysis of Gene Expression During the Saccharomyces cerevisiae Hypoxic Response
Source: PubMed Central journal article supplement (PMC5217111; doi:10.1534/g3.116.034991), 2016-11-09
Supplement: 221FigureS3.pdf [file 221FigureS3.pdf]

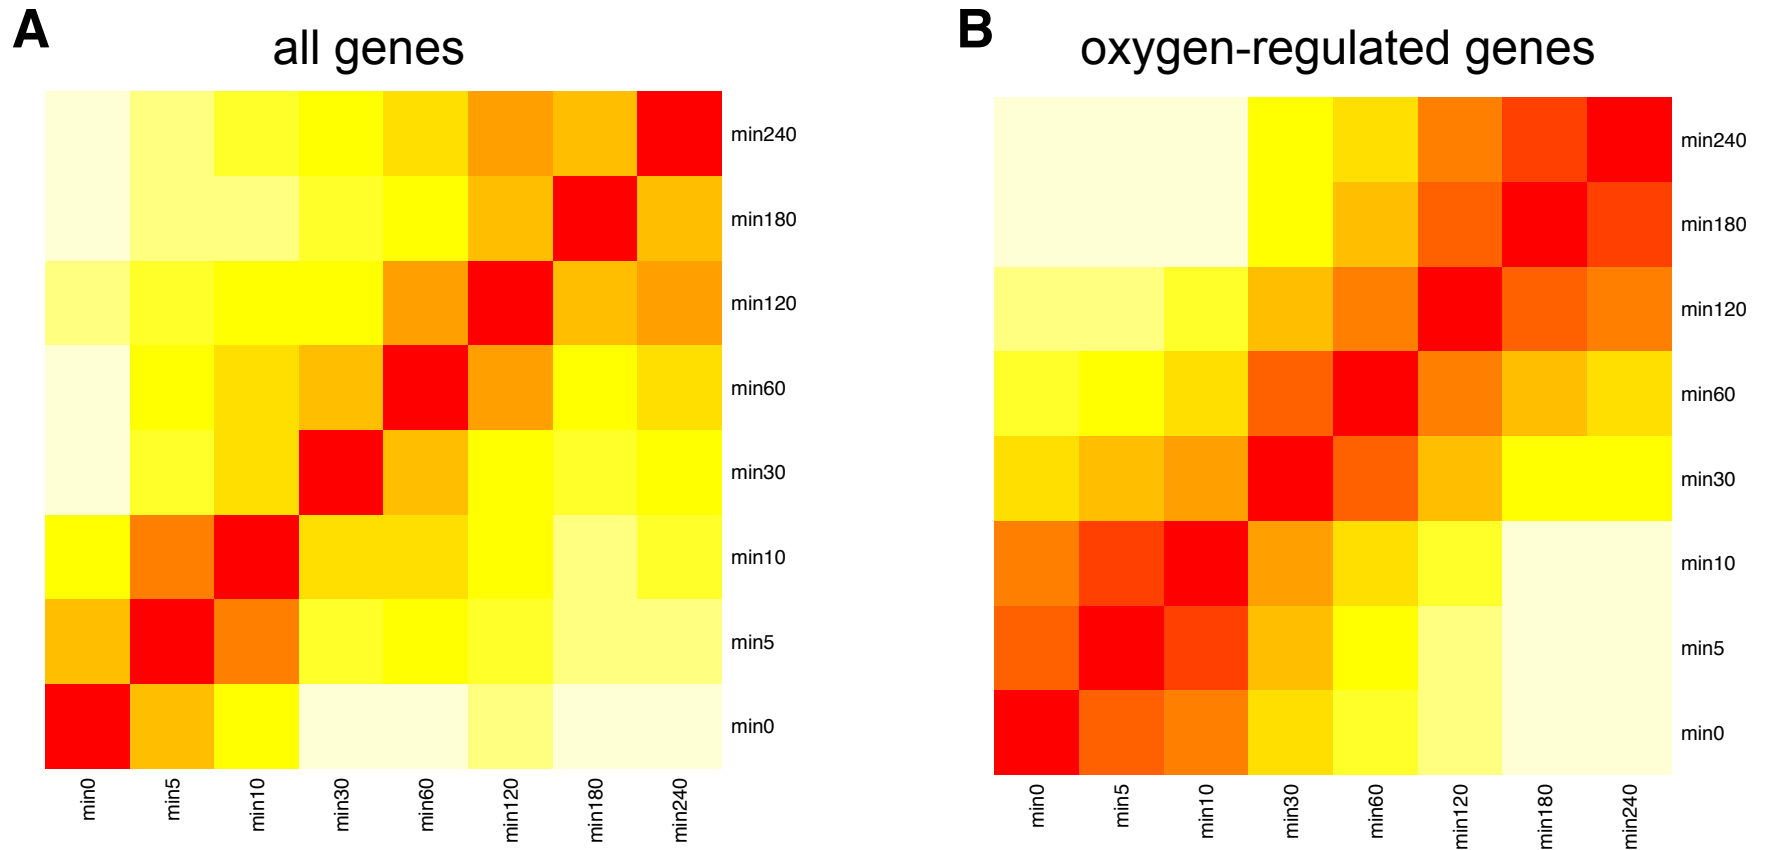

**Figure S3.** Heatmaps representing the Euclidian distance between samples. The  $\log_2$  transformed normalized expression values were input into the *dist* function in R. The darker colors indicate more closely-related samples, with red indicating identity. **(A)** Euclidian distance was determined between each pair of samples using expression of all genes. **(B)** Euclidian distance was determined between each pair of samples using expression of only the 816 oxygen-regulated genes.
