# Supplementary material for: Time-Course Analysis of Gene Expression During the Saccharomyces cerevisiae Hypoxic Response
Source: PubMed Central journal article supplement (PMC5217111; doi:10.1534/g3.116.034991), 2016-11-09
Supplement: 221FigureS4.pdf [file 221FigureS4.pdf]

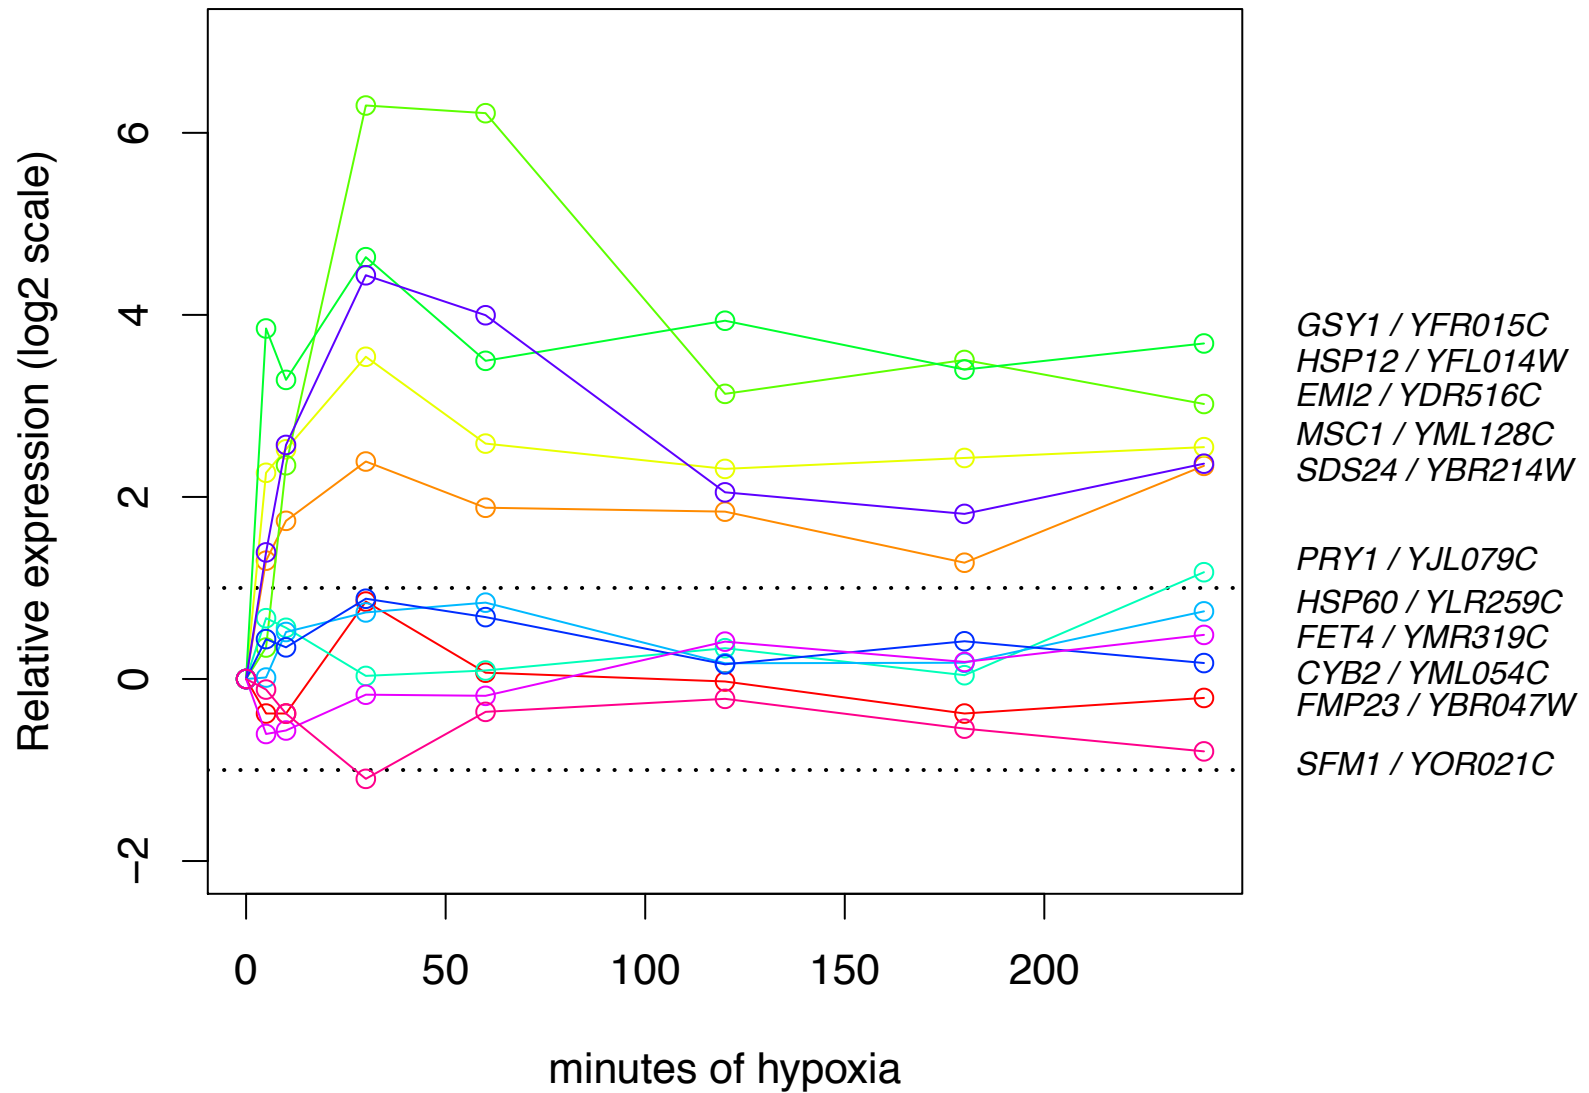

**Figure S4.** RNA-seq expression of the 11 genes identified as oxygen-regulated previously (observed in 5 previous microarray studies) but not identified here.
