# Supplementary material for: Time-Course Analysis of Gene Expression During the Saccharomyces cerevisiae Hypoxic Response
Source: PubMed Central journal article supplement (PMC5217111; doi:10.1534/g3.116.034991), 2016-11-09
Supplement: 221FigureS5.pdf [file 221FigureS5.pdf]

### oxygen-regulated genes

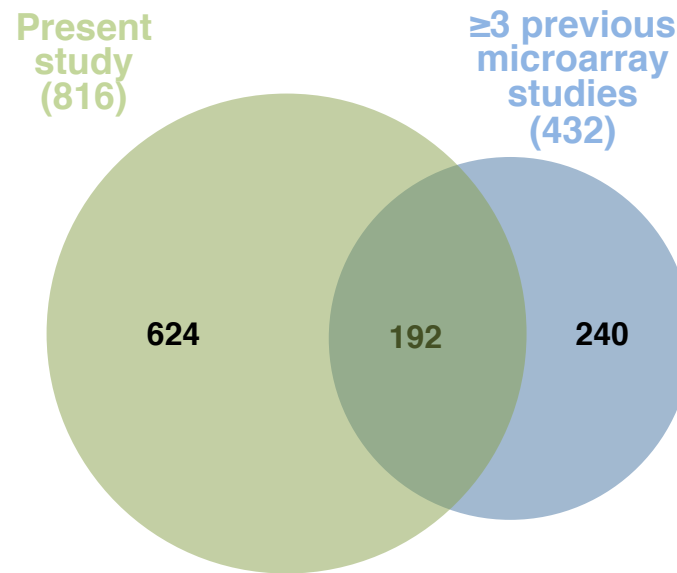

**Figure S5.** Venn diagram showing overlap of genes identified here by either one of the methods and genes identified in 3 or more previous microarrays. The overlap was 192 genes, but only 49 genes were expected to overlap by chance.
