# Supplementary material for: Time-Course Analysis of Gene Expression During the Saccharomyces cerevisiae Hypoxic Response
Source: PubMed Central journal article supplement (PMC5217111; doi:10.1534/g3.116.034991), 2016-11-09
Supplement: 221FigureS7.pdf [file 221FigureS7.pdf]

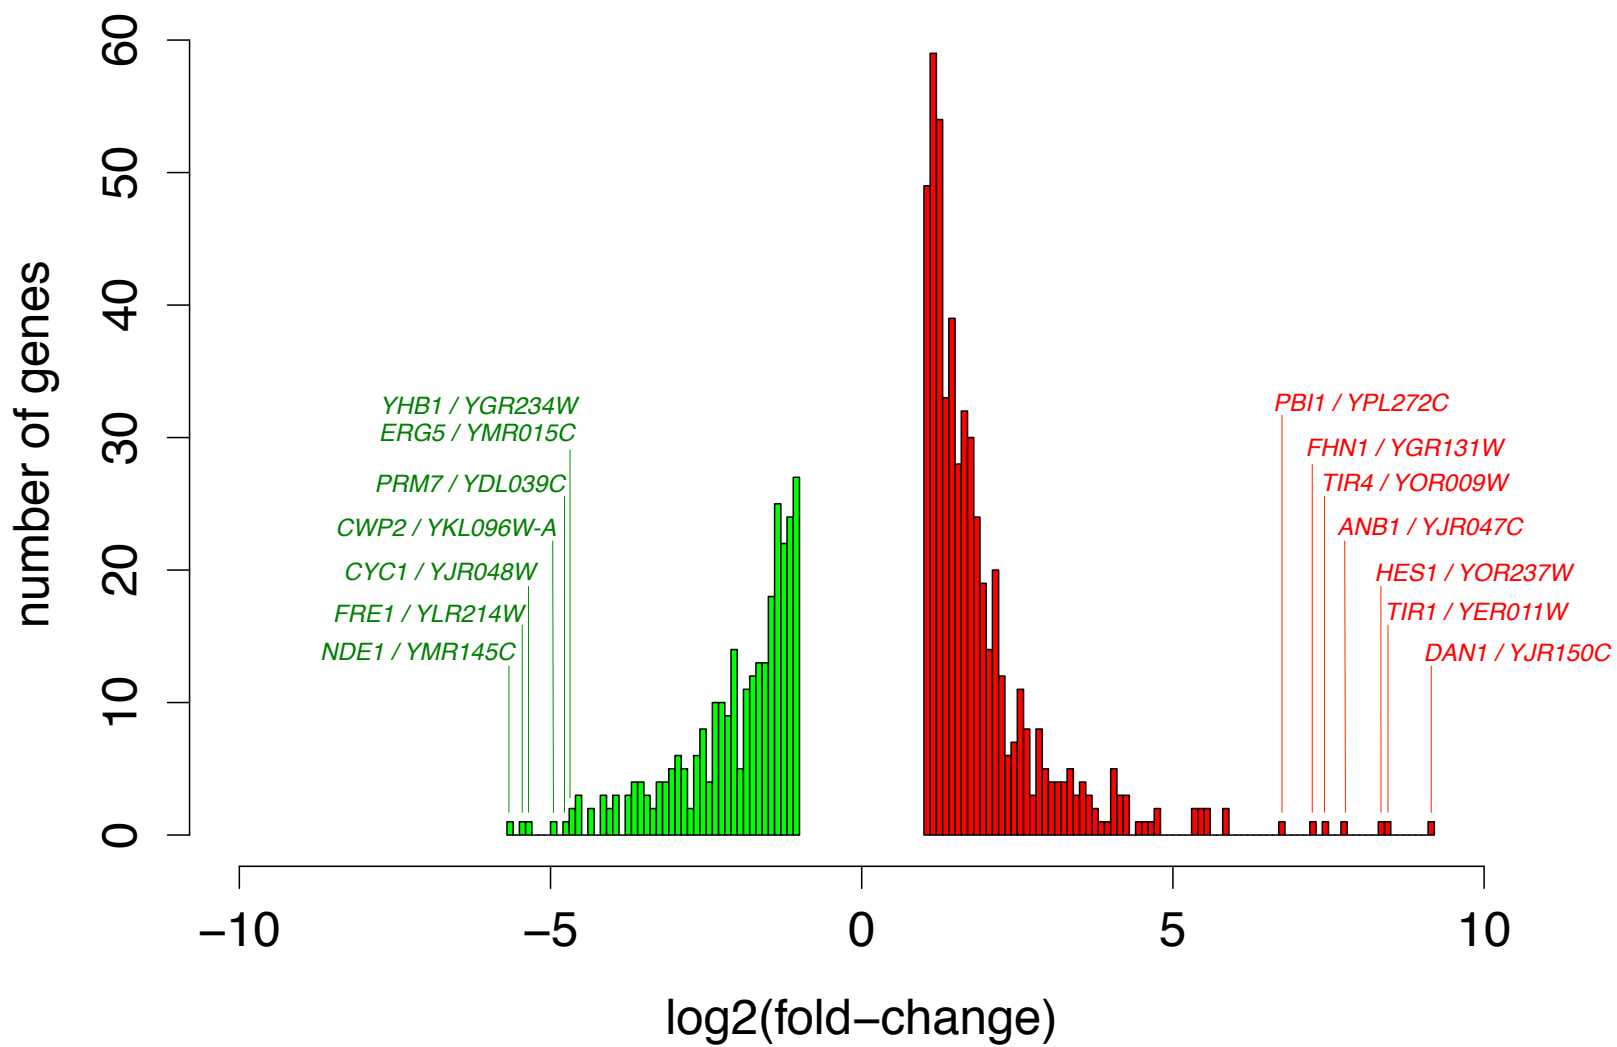

**Figure S7.** Wide distribution of fold-changes of the 816 oxygen-regulated genes identified by AutoCor or DESeq. The x-axis of this histogram represents the maximum fold change observed for a gene in the hypoxia time course. The genes with the lowest and highest fold changes are labeled. Other regulated genes are listed and described in Table S1.
