# Supplementary material for: Time-Course Analysis of Gene Expression During the Saccharomyces cerevisiae Hypoxic Response
Source: PubMed Central journal article supplement (PMC5217111; doi:10.1534/g3.116.034991), 2016-11-09
Supplement: 221FigureS8.pdf [file 221FigureS8.pdf]

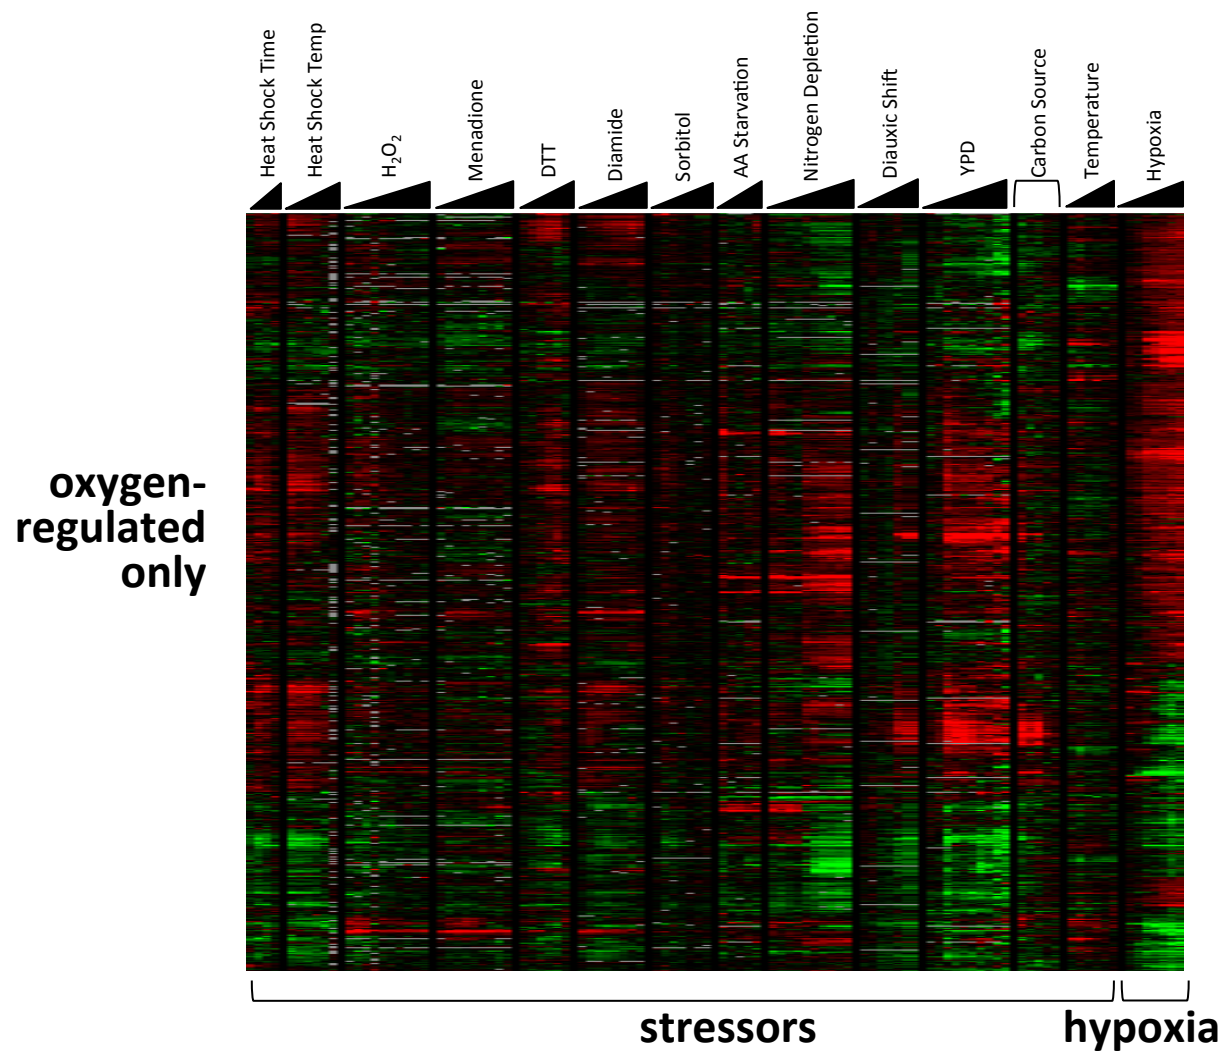

**Figure S8.** A heatmap shows that the hypoxic response is distinct from the response to stress. Shown are the genes that are oxygen-regulated but not part of the ESR.
