# Supplementary material for: Time-Course Analysis of Gene Expression During the Saccharomyces cerevisiae Hypoxic Response
Source: PubMed Central journal article supplement (PMC5217111; doi:10.1534/g3.116.034991), 2016-11-09
Supplement: 221FigureS9.pdf [file 221FigureS9.pdf]

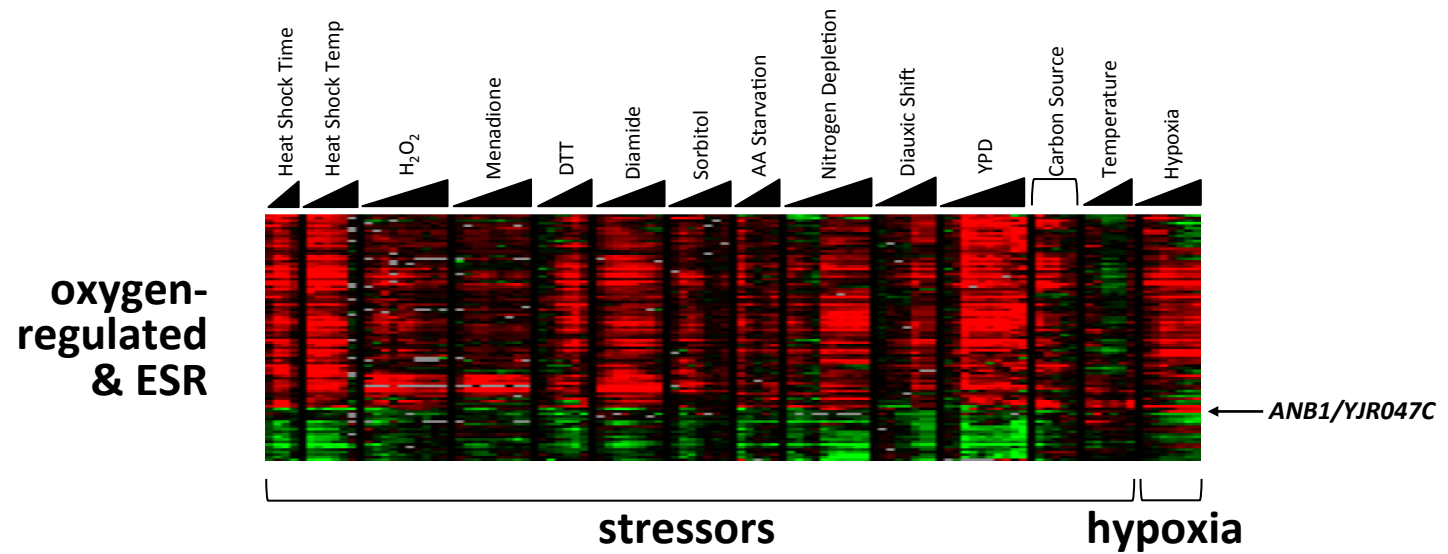

**Figure S9.** A heatmap shows that some, but not all, genes respond to both hypoxia and stress. Shown are the genes that are both oxygen-regulated and part of the ESR. The *ANB1* gene is indicated because it is induced by hypoxia but responds very differently to stress.
