# Supplementary material for: Time-Course Analysis of Gene Expression During the Saccharomyces cerevisiae Hypoxic Response
Source: PubMed Central journal article supplement (PMC5217111; doi:10.1534/g3.116.034991), 2016-11-09
Supplement: 221FigureS10.pdf [file 221FigureS10.pdf]

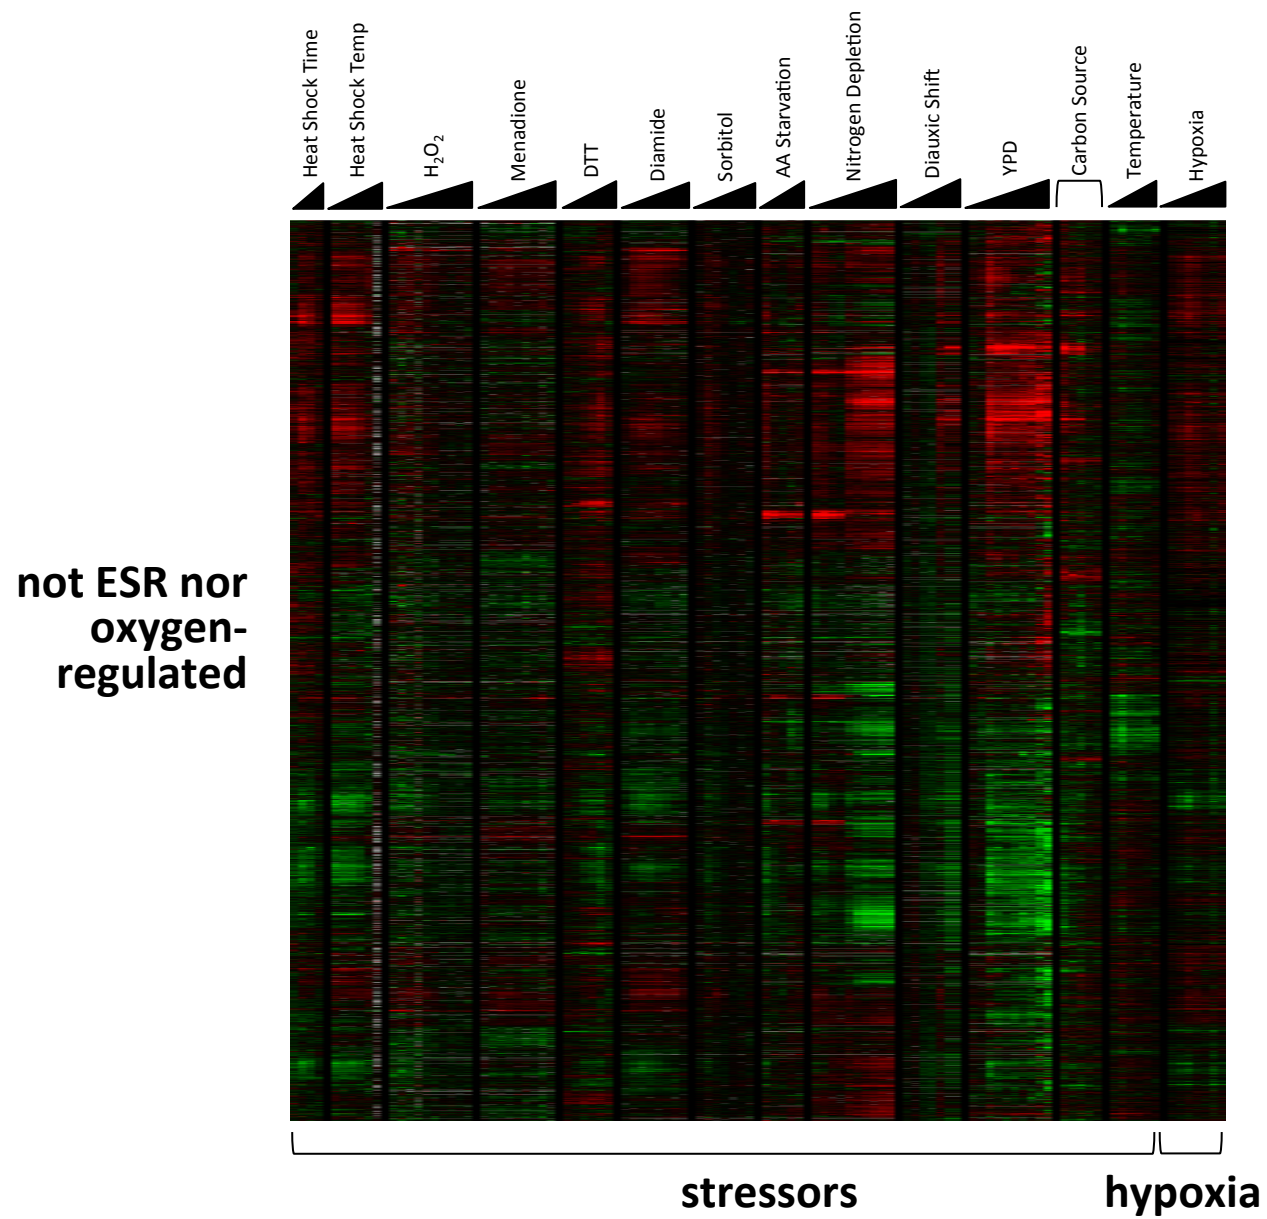

**Figure S10.** A heatmap showing the expression of genes that are not oxygen-regulated nor part of the ESR.
