# Supplementary material for: Time-Course Analysis of Gene Expression During the Saccharomyces cerevisiae Hypoxic Response
Source: PubMed Central journal article supplement (PMC5217111; doi:10.1534/g3.116.034991), 2016-11-09
Supplement: 221FigureS11.pdf [file 221FigureS11.pdf]

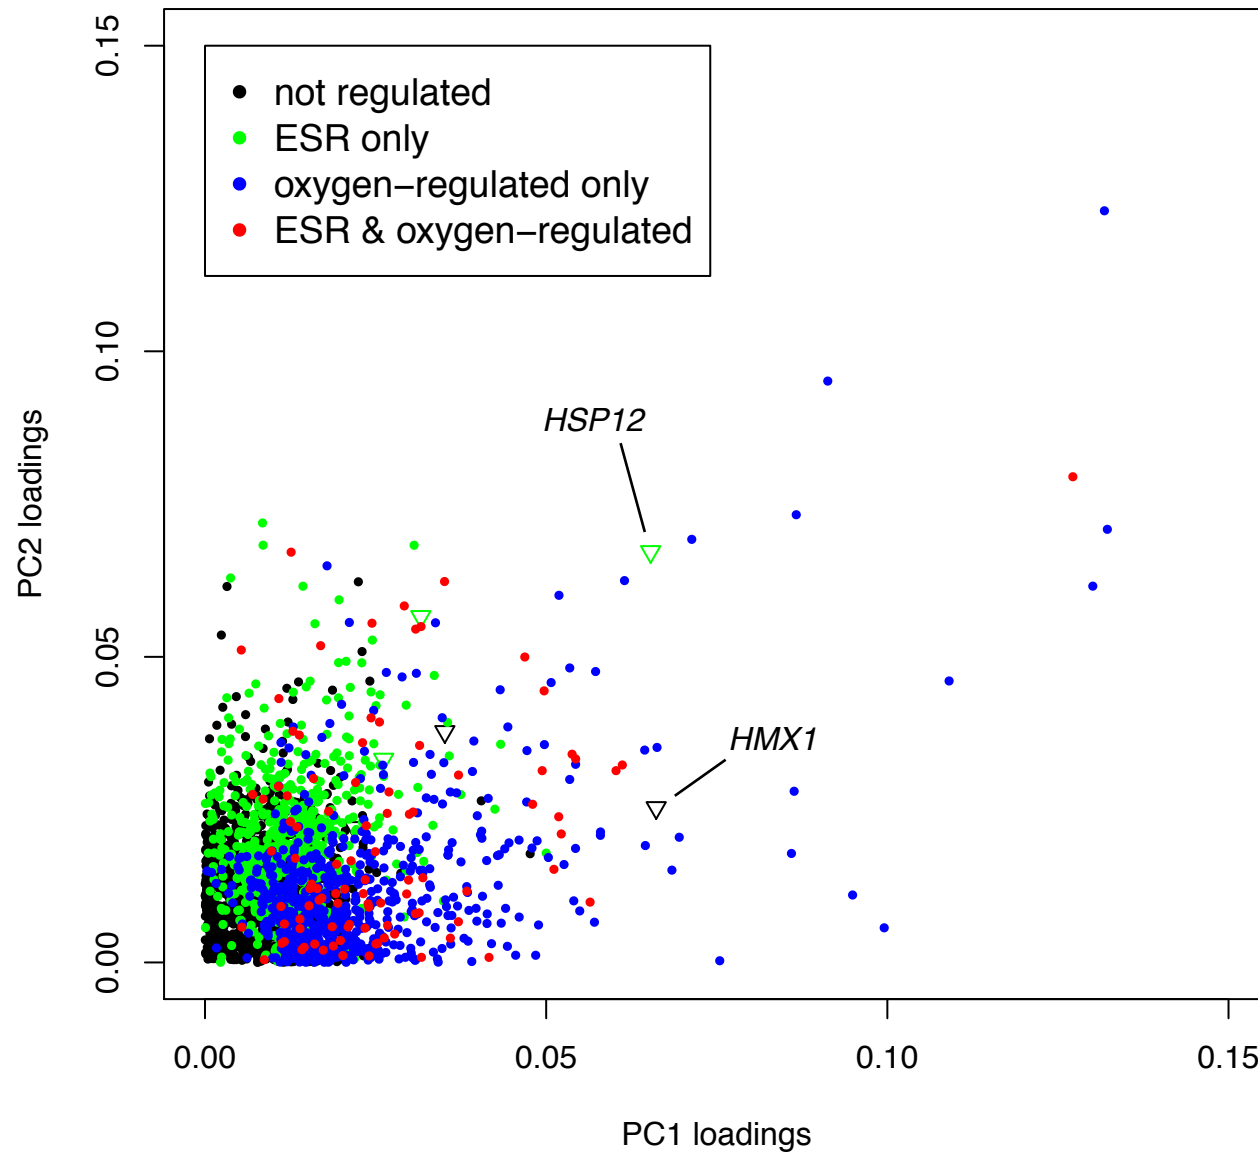

**Figure S11A.** The PC1 and PC2 loadings for all genes following PCA. Each data point is a gene. The six triangles represent genes that are discussed in the text and the triangles are color coded as in the legend.

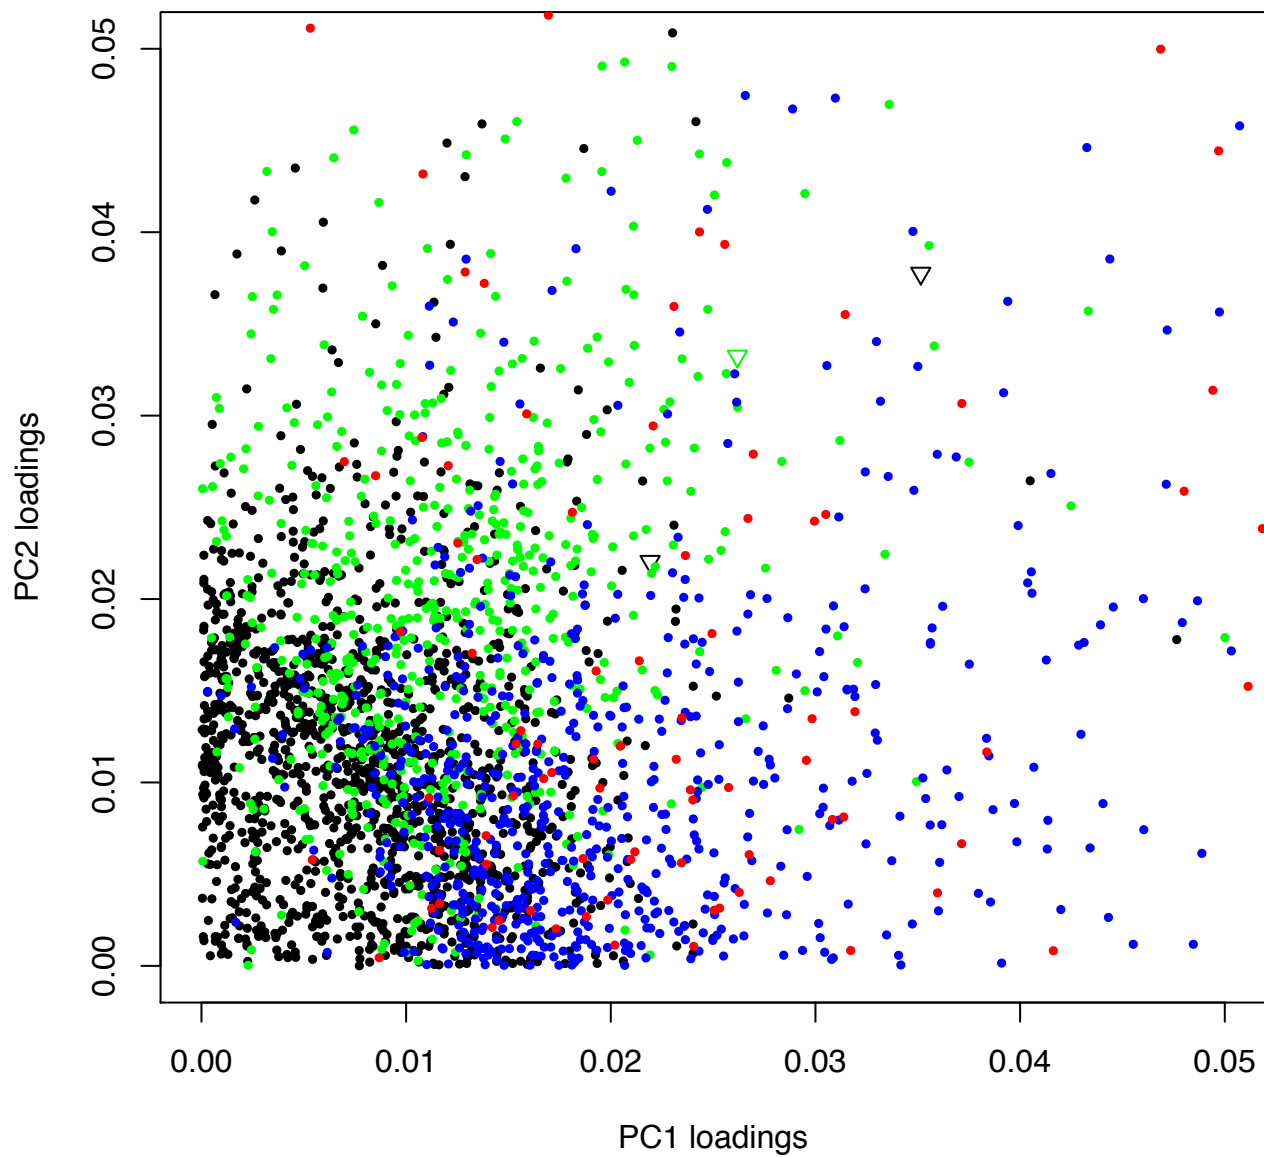

**Figure S11B.** This figure displays a zoomed-in version of the data in Figure S11A. Each axis scale is 0 to 0.05.
