# Supplementary material for: Time-Course Analysis of Gene Expression During the Saccharomyces cerevisiae Hypoxic Response
Source: PubMed Central journal article supplement (PMC5217111; doi:10.1534/g3.116.034991), 2016-11-09
Supplement: 221FigureS12.pdf [file 221FigureS12.pdf]

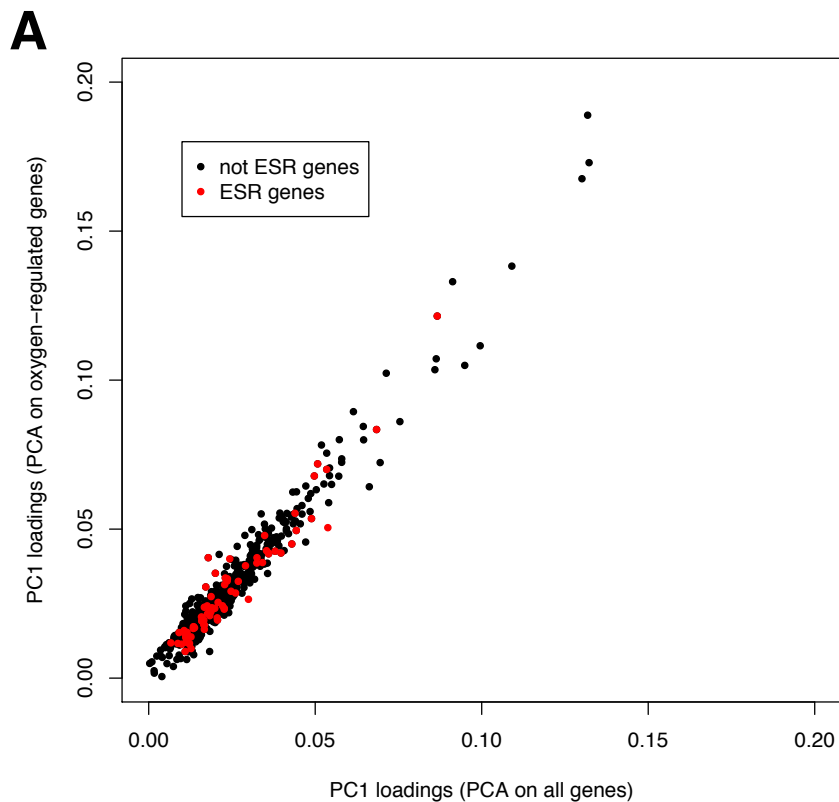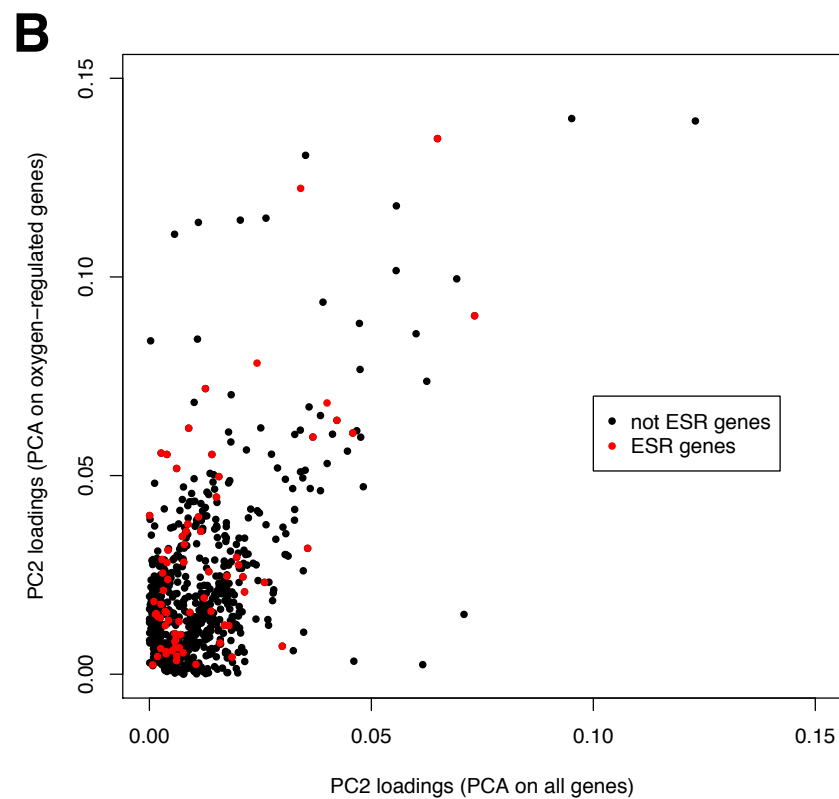

**Figure S12.** Comparison of the loadings between all-gene PCA (x-axes) and oxygen-regulated-gene PCA (y-axes). **(A)** PC1 loadings for each gene was compared between the two PCA analyses. **(B)** PC2 loadings for each gene was compared between the two PCA analyses.
