# Supplementary material for: Time-Course Analysis of Gene Expression During the Saccharomyces cerevisiae Hypoxic Response
Source: PubMed Central journal article supplement (PMC5217111; doi:10.1534/g3.116.034991), 2016-11-09
Supplement: 221FigureS13.pdf [file 221FigureS13.pdf]

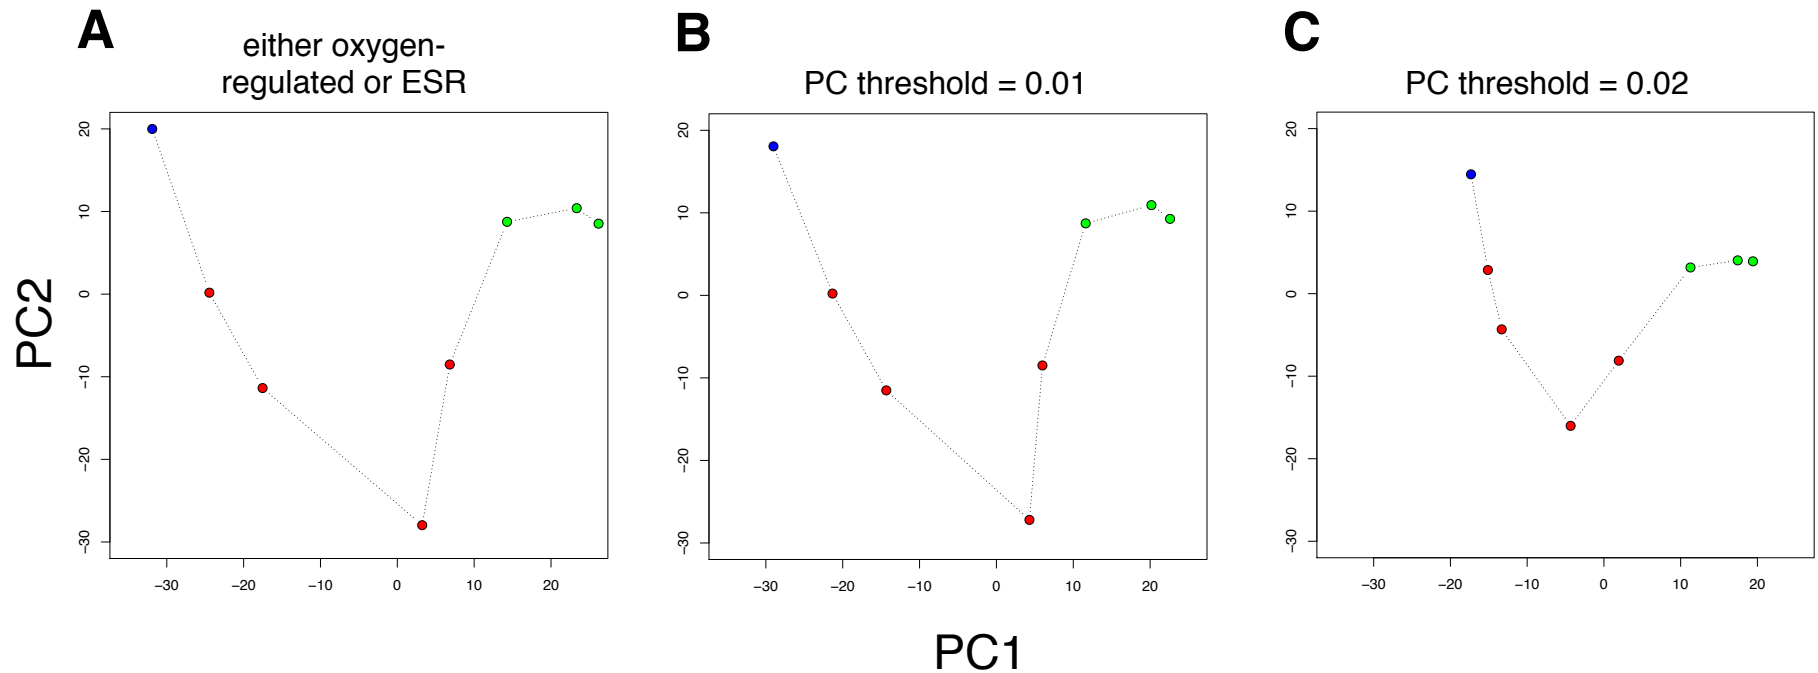

**Figure S13.** PCA on a subset of genes. **(A)** PCA on the 1705 genes that are either oxygen-regulated or part of the ESR. PC1 and PC2 captured 56.9% and 27.4%, respectively, of the variability in gene expression. **(B)** PCA on the 885 genes that had PC1 and PC2 loadings above 0.01 in the all-gene PCA (Figure 1A). PC1 and PC2 captured 53.5% and 31.8%, respectively, of the variability in gene expression. **(C)** PCA on the 168 genes that had PC1 and PC2 loadings above 0.02 in the all-gene PCA (Figure 1A). PC1 and PC2 captured 65.6% and 25.6%, respectively, of the variability in gene expression.
